# Supplementary material for: The reliability of maternal audit instruments to assign cause of death in maternal deaths review process: a systematic review and meta-analysis
Source: Springer Nature journal article supplement (doi:10.1186/s12884-021-03840-3), 2021-05-17
Supplement: MOESM2 [file 19169428]

## Additional file 2 Forest plot and funnel plot of the Maternal Death Review Instrument

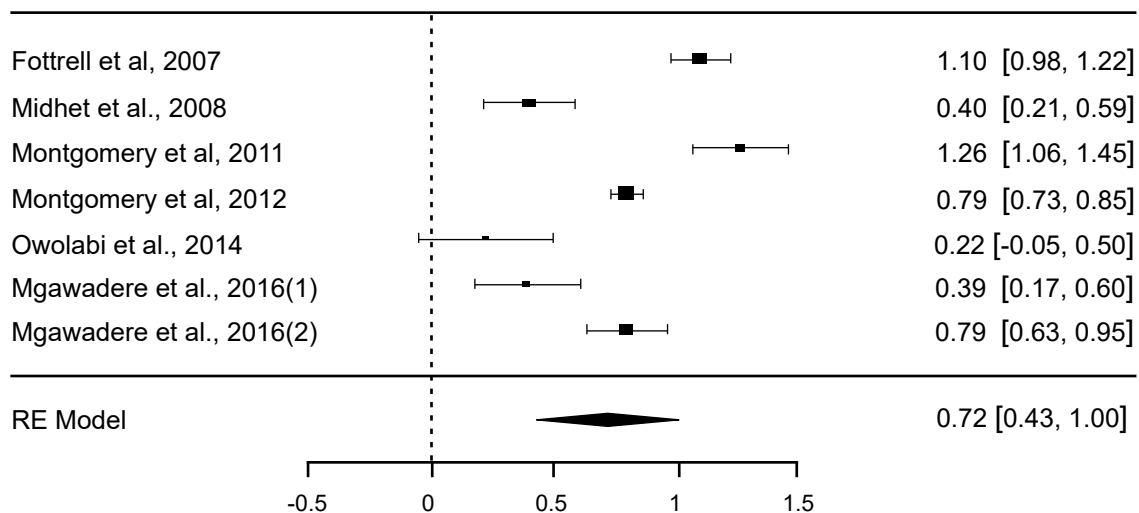

(a). Forest plots of MDR instruments

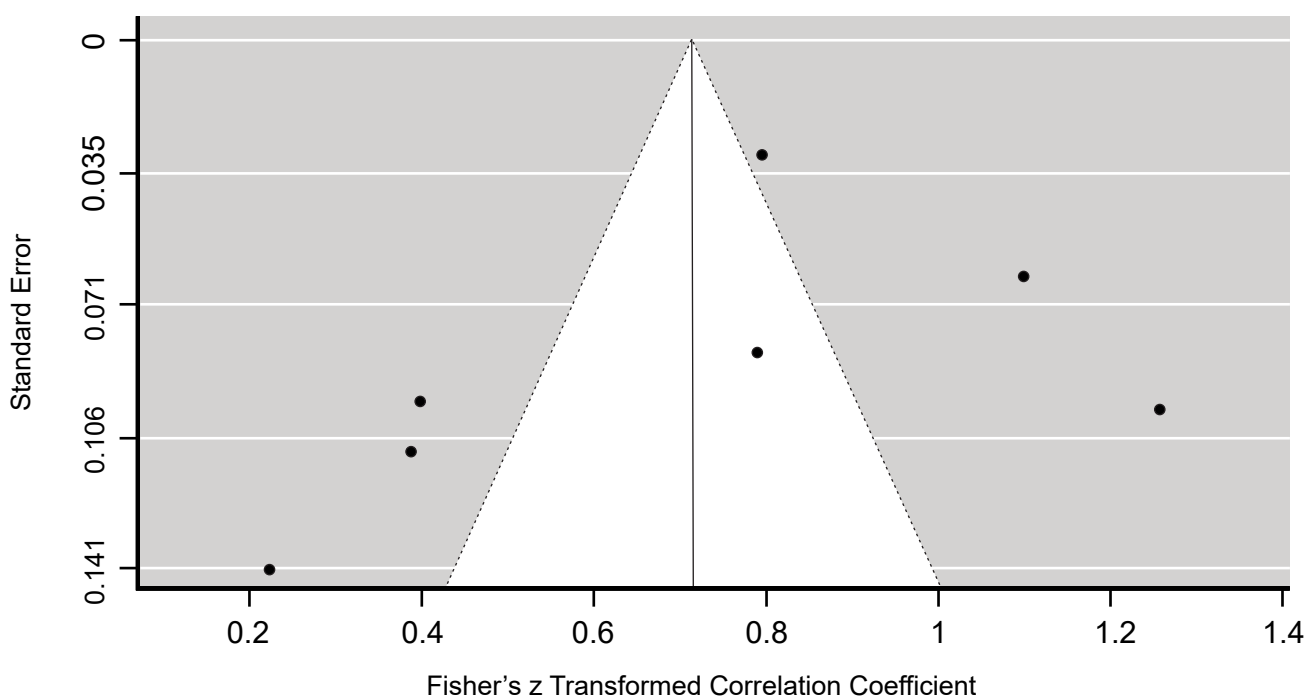

(b). Funnel plots of MDR instruments
